# Supplementary material for: N-protein vaccine Convacell® is effective against COVID-19: phase 3, randomized, double-blind, placebo-controlled clinical trial
Source: bioRxiv or medRxiv preprint supplement (doi:10.1101/2024.04.01.24304717), 2024-04-09
Supplement: Supplementary file [file media-1.pdf]

| Name                             | Affiliation                                                                                                                                                                                                                                                                                                      | Email                                                                          |
|----------------------------------|------------------------------------------------------------------------------------------------------------------------------------------------------------------------------------------------------------------------------------------------------------------------------------------------------------------|--------------------------------------------------------------------------------|
| Zakharov Konstantin Anatolyevich | Limited Liability Company "Scientific Research Center Eco-safety", legal address: 196143, St. Petersburg, Yuri Gagarin Ave., 65                                                                                                                                                                                  | <a href="mailto:konstantin.zakharov@mail.ru">konstantin.zakharov@mail.ru</a>   |
| Vasiliuk Vasily Bogdanovich      | Limited Liability Company "Scientific Research Center Eco-safety", legal address: 196143, St. Petersburg, Yuri Gagarin Ave., 65                                                                                                                                                                                  | <a href="mailto:vasi-vasilyk@yandex.ru">vasi-vasilyk@yandex.ru</a>             |
| Vasilevskaya Olga Albertovna     | Limited Liability Company "Medical Diagnostic Center", legal address: 150000, Yaroslavl, Ushinsky str., 4b                                                                                                                                                                                                       | <a href="mailto:v-olga76@yandex.ru">v-olga76@yandex.ru</a>                     |
| Alpenidze Diana Nodarievna       | St. Petersburg State Budgetary Healthcare Institution "City polyclinic No. 117", legal address: 194358, St. Petersburg, Simonov str., 5, building 1, lit. A                                                                                                                                                      | <a href="mailto:d.alpenidze@mail.ru">d.alpenidze@mail.ru</a>                   |
| Mullagalieva Ekaterina Andreevna | State Autonomous Healthcare Institution "Engels City Clinical Hospital No. 1", legal address: 6 Vesennaya str., Engels, 413116                                                                                                                                                                                   | <a href="mailto:katyfily@yandex.ru">katyfily@yandex.ru</a>                     |
| Gamova Inna Valeryevna           | Limited Liability Company "DNA Research Center", legal address: 280 Rakhov str., Saratov, 410005                                                                                                                                                                                                                 | <a href="mailto:innapris@yandex.ru">innapris@yandex.ru</a>                     |
| Bouchard Maxim Osmanovich        | Limited Liability Company "Medical services", legal address: 194356, St. Petersburg, Vyborg highway, house 40 litera A.                                                                                                                                                                                          | <a href="mailto:maxbushara@gmail.com">maxbushara@gmail.com</a>                 |
| Tomaev Uruzmag Mairbekovich      | Limited Liability Company "Firm ORIS" legal address: 117321, Moscow, Trade Union str., 154, building 1                                                                                                                                                                                                           | <a href="mailto:utomaev@mail.ru">utomaev@mail.ru</a>                           |
| Bunkova Elena Borisovna          | Private institution educational organization of higher education "Medical University "Reaviz" legal address: 443001, Samara, Chapaevskaya str. 227                                                                                                                                                               | <a href="mailto:bunkova27@mail.ru">bunkova27@mail.ru</a>                       |
| Evsina Maria Gennadievna         | State Autonomous Healthcare Institution of the Sverdlovsk region "Aramil City Hospital" legal address: 624002, Sverdlovsk region, Aramil, Sadovaya str., 10                                                                                                                                                      | <a href="mailto:evsinam@mail.ru">evsinam@mail.ru</a>                           |
| Bakhtina Natalia Vladimirovna    | State regional budgetary healthcare Institution "Murmansk Regional Clinical Hospital named after P.A. Bayandin" legal address: 183032, Murmansk, Akademika Pavlova str., 6, building 3                                                                                                                           | <a href="mailto:nv_bakhtina@mail.ru">nv_bakhtina@mail.ru</a>                   |
| Shapovalova Yulia Sergeevna      | Private healthcare institution "Clinical Hospital "Russian Railways-Medicine" Chelyabinsk"" legal address: 41, Zwilling str., Chelyabinsk, 454091                                                                                                                                                                | <a href="mailto:ushapo@mail.ru">ushapo@mail.ru</a>                             |
| Saenko Darya Viktorovna          | Limited Liability Company "Ultrasound 4D Clinic" legal address: 357502, Pyatigorsk, Kuznechnaya str., No. 26                                                                                                                                                                                                     | <a href="mailto:dashavita@mail.ru">dashavita@mail.ru</a>                       |
| Leontieva Marina Alexandrovna    | Limited Liability Company "Clinic Zvezdnaya" legal address: 196158, St. Petersburg, Moskovskoe sh., house 5, letter A, room 9-N                                                                                                                                                                                  | <a href="mailto:PILeonteva@yandex.ru">PILeonteva@yandex.ru</a>                 |
| Shkarbul Dmitry Yurievich        | Limited liability Company "Clinic Zvezdnaya" legal address: 196158, St. Petersburg, Moskovskoe shosse, 5, litera A, room 9-N.                                                                                                                                                                                    | <a href="mailto:info@starsclinic.ru">info@starsclinic.ru</a>                   |
| Teplykh Svetlana Valeryevna      | Limited Liability Company "Professorial Clinic" legal address: 614070, Perm, Druzhby str., 15 A                                                                                                                                                                                                                  | <a href="mailto:profklinki@mail.ru">profklinki@mail.ru</a>                     |
| Chizhov Danila Alexandrovich     | St. Petersburg State Budgetary Healthcare Institution "City Polyclinic No. 106", legal address: 198328, St. Petersburg, Richard Sorge str., 1, lit. A, actual address: 198206, St. Petersburg, Admiral Cherkov, 12, p. 1                                                                                         | <a href="mailto:danila@chizhov.me">danila@chizhov.me</a>                       |
| Panevina Vera Sergeevna          | St. Petersburg State Budgetary Healthcare Institution "City Polyclinic No. 4", 199178, St. Petersburg, V.O., Bolshoy ave., 59, lit. A                                                                                                                                                                            | <a href="mailto:panezhina.doc@gmail.com">panezhina.doc@gmail.com</a>           |
| Romanenkov Andrey Andreevich     | Limited Liability Company "North-Western Medical Center" (LLC "SZMC"), legal address: 191144, St. Petersburg, vn.ter.g. Smolninskoye municipal district, Moiseenko str., 5, letter A, room. 2nd office 12. The address of the CI: 194355, St. Petersburg, Prospekt Prosveshcheniya, 14 K.4, letter A, room 30-N. | <a href="mailto:timeron@mail.ru">timeron@mail.ru</a>                           |
| Frolov Alexey Vyacheslavovich    | 445846, Samara region, Tolyatti, 40 let Pobedy str., 51B, 445846, Samara region, Tolyatti, 40 let Pobedy str., 51A                                                                                                                                                                                               | <a href="mailto:frolovalexej@yandex.ru">frolovalexej@yandex.ru</a>             |
| Astankovich Alesya Vladimirovna  | Limited Liability Company Sphere-Med, 197342, St. Petersburg, embankment of the Black River, house 41, building 2, letter B                                                                                                                                                                                      | <a href="mailto:alesya.astankovich@yandex.ru">alesya.astankovich@yandex.ru</a> |
